# Supplementary material for: Evaluation of a self-monitoring protocol for assessing soot and polycyclic aromatic hydrocarbon exposure among chimney sweeps
Source: Frontiers journal article supplement (doi:10.3389/fepid.2024.1436812), 2024-09-04
Supplement: Data_Sheet_1.PDF [file Data_Sheet_1.PDF]

## *Supplementary Material*

### **1 Supplementary Data**

The diary including work tasks used in the study is displayed in the following pages. The diary has been translated from Swedish to English.

(Fill out once per participant)

Name: \_\_\_\_\_

Employer/workplace: \_\_\_\_\_

Study ID (filled out by researcher): \_\_\_\_\_

**Car**

|                      |  |
|----------------------|--|
| Model of car         |  |
| Last cleaning of car |  |

**Smoking?**

Yes ☐

No ☐

(Fill out once per participant)

## Time points

**Week 1** Fill out your working hours for the measurement days (time point for starting and ending the measurement with the device)

|                   | Date | Start<br>(time) | Handling filter in<br>vacuum cleaner<br>(time) | Stop<br>(time) |
|-------------------|------|-----------------|------------------------------------------------|----------------|
| Measurement day 1 |      |                 |                                                |                |
| Measurement day 2 |      |                 |                                                |                |
| Measurement day 3 |      |                 |                                                |                |
| Measurement day 4 |      |                 |                                                |                |

**Week 2** Fill out your working hours for the measurement days (time point for starting and ending the measurement with the device)

|                   | Date | Start<br>(time) | Handling filter in<br>vacuum cleaner<br>(time) | Stop<br>(time) |
|-------------------|------|-----------------|------------------------------------------------|----------------|
| Measurement day 1 |      |                 |                                                |                |
| Measurement day 2 |      |                 |                                                |                |
| Measurement day 3 |      |                 |                                                |                |
| Measurement day 4 |      |                 |                                                |                |

(Fill out for each sweeping task)

Date

Time point when the task

*Initiated*

*Finished*

### 1. Type of assignment

|                          |                                                                        |
|--------------------------|------------------------------------------------------------------------|
| <input type="checkbox"/> | Black sweeping                                                         |
| <input type="checkbox"/> | Fire safety inspection / Ventilation control / cleaning of ventilation |
| <input type="checkbox"/> | Commercial kitchen / Restaurant                                        |

Other: \_\_\_\_\_

### 2. Type of object

|                          |                   |
|--------------------------|-------------------|
| <input type="checkbox"/> | Resident building |
| <input type="checkbox"/> | Central boiler    |
| <input type="checkbox"/> | Industry          |

### 3. Sweeping technique

Traditional ☐

Rotating rod ☐

### 4. Fuel

|                          |                       |
|--------------------------|-----------------------|
| <input type="checkbox"/> | Oil                   |
| <input type="checkbox"/> | Wood                  |
| <input type="checkbox"/> | Pellets               |
| <input type="checkbox"/> | Inside wood fireplace |

Other: \_\_\_\_\_

### 5. Personal protective equipment

|                          |                                                         |
|--------------------------|---------------------------------------------------------|
| <input type="checkbox"/> | Respiratory protection mask                             |
| <input type="checkbox"/> | Gloves                                                  |
| <input type="checkbox"/> | Protective clothes<br>(long sleeves and legs on pants?) |
| <input type="checkbox"/> | Vacuum cleaner for soot                                 |

Filter type: \_\_\_\_\_
